# Supplementary material for: Photocytotoxic luminescent lanthanide complexes of DTPA–bisamide using quinoline as photosensitizer
Source: Royal Society of Chemistry journal article supplement (doi:10.1039/c5ra24329g), 2015-01-01
Supplement: c5ra24329g1.pdf [file c5ra24329g1.pdf]

## Supporting Information

### **Photocytotoxic luminescent lanthanide complexes of DTPA– bisamide using quinoline as photosensitizer**

*Khushbu Singh,<sup>†</sup> Samya Banerjee<sup>‡</sup> and Ashis K. Patra<sup>\*,†</sup>*

<sup>†</sup>Department of Chemistry, Indian Institute of Technology Kanpur, Kanpur 208016, Uttar  
Pradesh, India

<sup>‡</sup>Department of Inorganic and Physical Chemistry, Indian Institute of Science, Bangalore  
560012, Karnataka, India

\*E-mail: akpatra@iitk.ac.in

| <b><u>Table of Contents</u></b>                                                                                                             | <b>Page No.</b> |
|---------------------------------------------------------------------------------------------------------------------------------------------|-----------------|
| <b><u>Experimental</u></b>                                                                                                                  |                 |
| <b>Scheme S1: General synthetic scheme</b> for complexes <b>1-3</b>                                                                         | <b>S4</b>       |
| <b>Figure S1: ESI-Mass spectra</b> showing isotopic distribution for [Pr(DTPAAQ)(DMF)] ( <b>1</b> )                                         | <b>S5</b>       |
| <b>Figure S2: ESI-Mass spectra</b> showing isotopic distribution for [Eu(DTPAAQ)(DMF)] ( <b>2</b> )                                         | <b>S6</b>       |
| <b>Figure S3: ESI-Mass spectra</b> showing isotopic distribution for [Tb(DTPAAQ)(DMF)] ( <b>3</b> )                                         | <b>S7</b>       |
| <b><u>Crystallographic Data</u></b>                                                                                                         |                 |
| <b>Figure S4:</b> Unit cell packing diagram of [Pr(DTPAAQ)(DMF)] ( <b>1</b> )                                                               | <b>S8</b>       |
| <b>Figure S5:</b> ORTEP view of [Pr(DTPAAQ)(H <sub>2</sub> O)] ( <b>1a</b> )                                                                | <b>S9</b>       |
| <b>Figure S6:</b> Unit cell packing diagram of [Pr(DTPAAQ)(H <sub>2</sub> O)] ( <b>1a</b> )                                                 | <b>S10</b>      |
| <b>Figure S7:</b> Unit cell packing diagram of [Eu(DTPAAQ)(DMF)] ( <b>2</b> )                                                               | <b>S11</b>      |
| <b>Figure S8:</b> Unit cell packing diagram of [Tb(DTPAAQ)(DMF)] ( <b>3</b> )                                                               | <b>S12</b>      |
| <b>Table S1.</b> Crystal data and structural refinement details for complexes <b>1a</b> and <b>1-3</b> .                                    | <b>S13</b>      |
| <b>Table S2:</b> Selected bond distances (Å) and bond angles (deg) for [Pr(DTPAAQ)(DMF)] ( <b>1</b> )                                       | <b>S14</b>      |
| <b>Table S3:</b> Selected bond distances (Å) and bond angles (deg) for [Pr(DTPAAQ)(H <sub>2</sub> O)] ( <b>2</b> )                          | <b>S15</b>      |
| <b>Table S4:</b> Selected bond distances (Å) and bond angles (deg) for [Eu(DTPAAQ)(DMF)] ( <b>3</b> )                                       | <b>S16</b>      |
| <b>Table S5:</b> Selected bond distances (Å) and bond angles (deg) for Tb(DTPAAQ)(DMF)] ( <b>4</b> )                                        | <b>S17</b>      |
| <b>Figure S9.</b> Coordination polyhedra of the nine-coordinate {LnN <sub>3</sub> O <sub>6</sub> } lanthanide cores in complexes <b>1-3</b> | <b>S18</b>      |
| <b>Figure S10.</b> Plot showing comparison of bond distances (Å) for complexes <b>1, 2</b> and <b>3</b> .                                   | <b>S19</b>      |
| <b>Figure S11: Steady state luminescence spectra</b> of complexes <b>1-3</b>                                                                | <b>S20</b>      |
| <b>Figure S12: Time-resolved luminescence spectra</b> of complex <b>1</b>                                                                   | <b>S21</b>      |

**Table S6.** Luminescence lifetime ( $\tau$ ), determination of inner-sphere hydration number ( $q$ ) of the complexes in H<sub>2</sub>O and D<sub>2</sub>O **S22**

**DNA and BSA Binding Studies**

**Figure S14: DNA binding plots** by UV-Vis spectral method for complex **1** **S23**

**Figure S15: DNA binding plots** by UV-Vis spectral method for complex **2** **S24**

**Figure S16: DNA binding plots** by UV-Vis spectral method for complex **3** **S25**

**Figure S17: Ethidium bromide displacement assay** for [Pr(DTPAAQ)(DMF)] **S26**  
(1)

**Figure S18: Ethidium bromide displacement assay** for **S27**  
[Eu(DTPAAQ)(DMF)] (2)

**Figure S19: Ethidium bromide displacement assay** for **S28**  
[Tb(DTPAAQ)(DMF)] (3)

**Figure S20: BSA binding plots** for complex **1** **S29**

**Figure S21: BSA binding plots** for complex **2** **S30**

**DNA/BSA Sensing Studies**

**Figure S22: Time resolved luminescence spectra** of [Tb(DTPAAQ)(DMF)] (3) **S31**  
on increasing concentration of CT-DNA

**Figure S24: Luminescence decay profile** of complex **2** and **3** in presence of CT- **S32**  
DNA

**Table S7: Luminescence lifetime** of complexes **2** and **3** in presence of CT-DNA **S32**

**DNA Cleavage Studies**

**Figure S24: Time dependent photo-induced DNA cleavage** of complexes **1-3** **S33**  
(100  $\mu$ M) at 312 nm

---

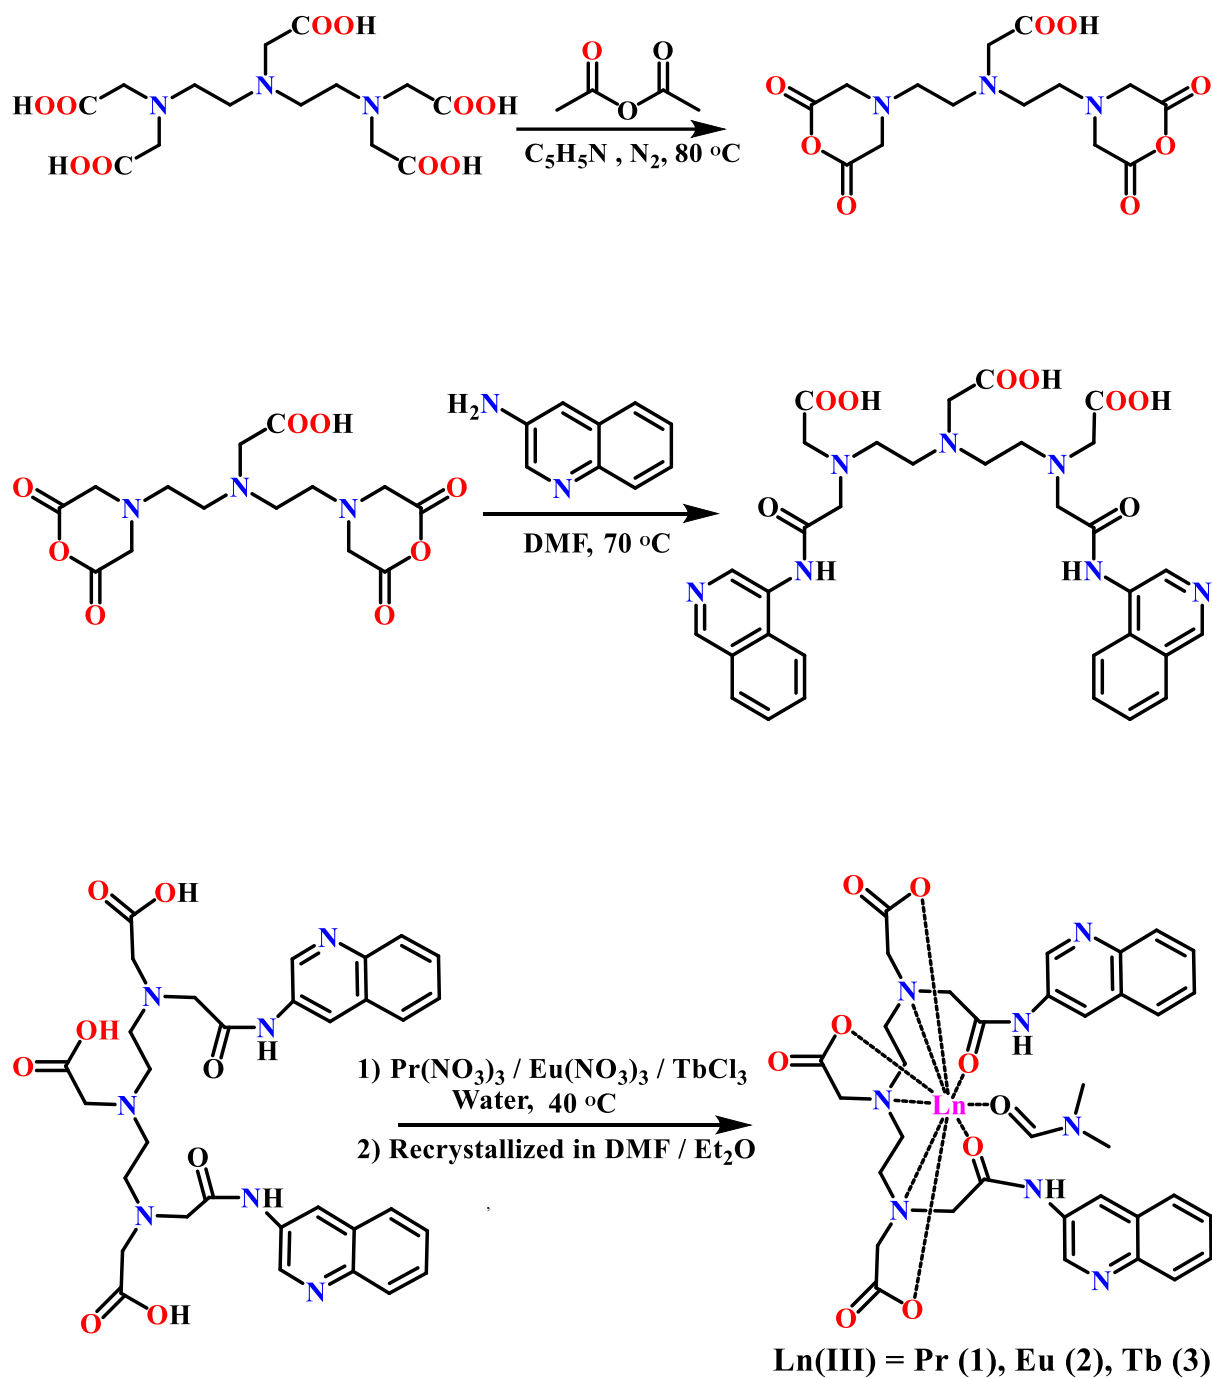

**Scheme S1.** General synthetic scheme for H<sub>3</sub>DTPAAQ ligand and complexes **1-3**.

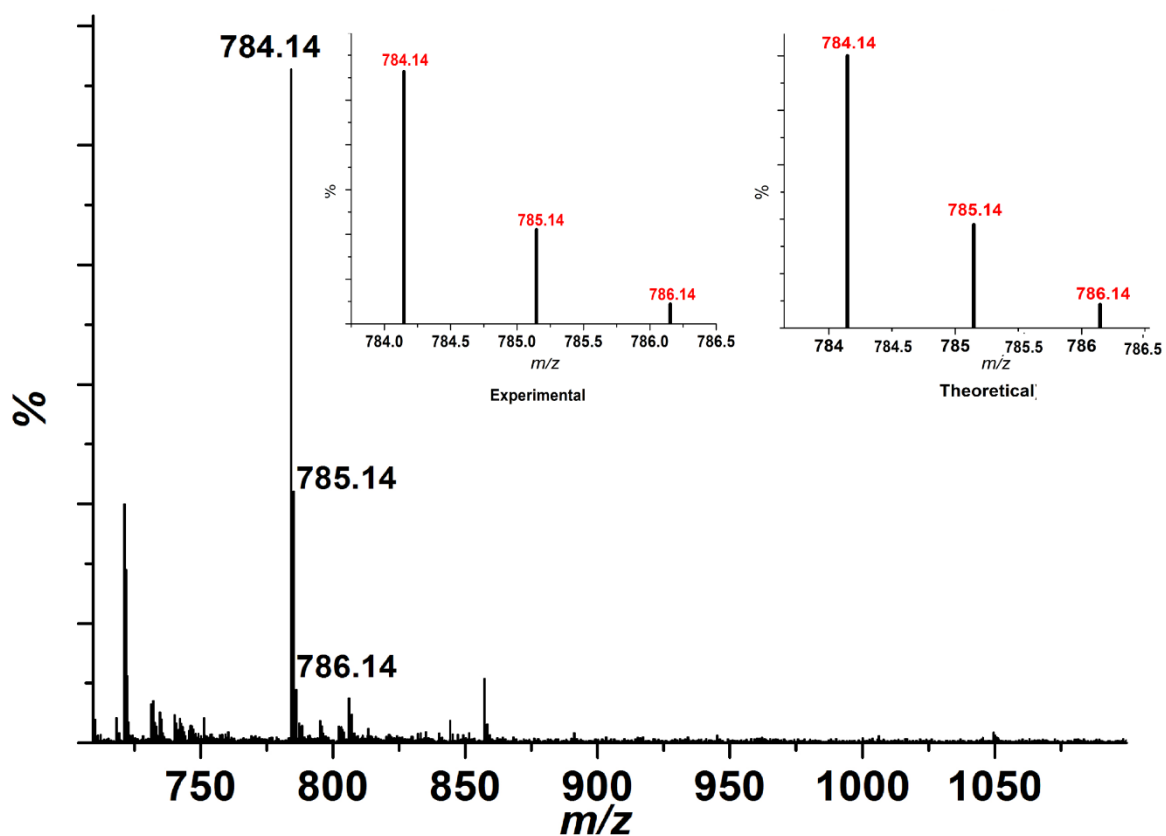

**Figure S1.** ESI-MS of complex **1** in aqueous-DMF:  $m/z$  [(**1**-DMF + H)<sup>+</sup> calcd. for C<sub>32</sub>H<sub>32</sub>N<sub>7</sub>O<sub>8</sub>Pr (relative abundance): 784.14 (100.0%), 785.14 (37.93%), 786.14 (8.5%). Found: 784.14 (100.0%), 785.14 (39.82%), 786.14 (7.8%).

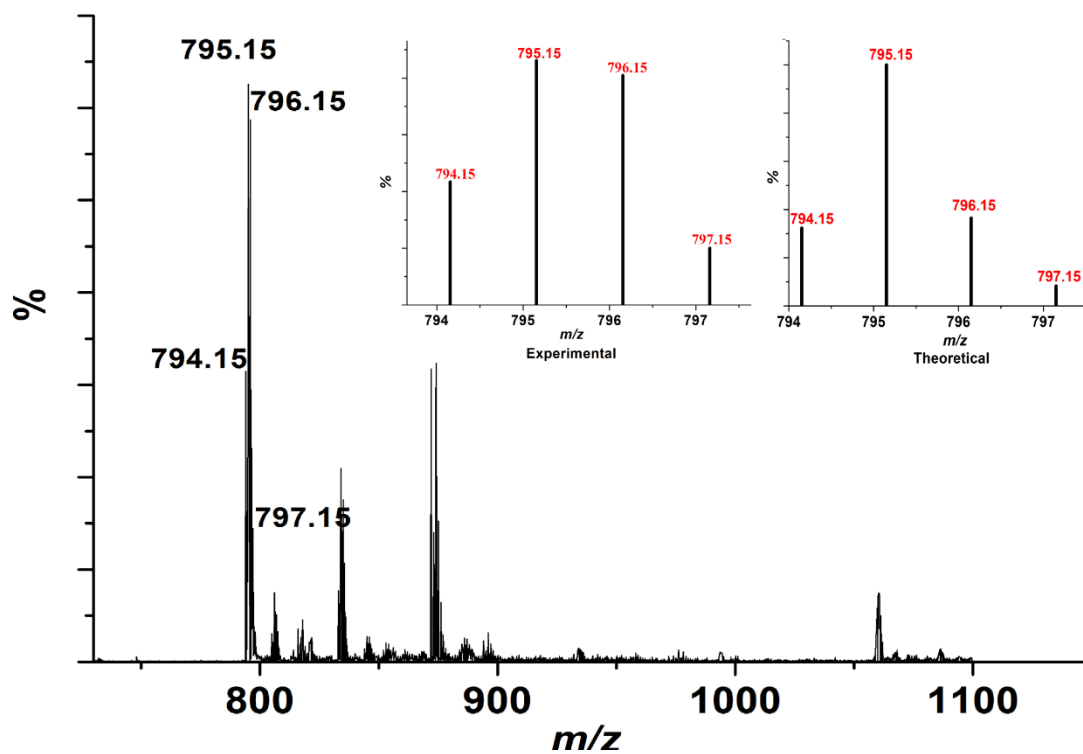

**Figure S2.** ESI-MS of complex **2** in aqueous DMF:  $m/z$  [**2** – DMF + H]<sup>+</sup>; calcd. for C<sub>32</sub>H<sub>32</sub>N<sub>7</sub>O<sub>8</sub>Eu (relative abundance): 795.15 (100.0%), 794.15 (38.2%), 796.15 (45.5%), 797.15 (3.3%). Found: 795.15 (100.0%), 794.15 (90.8%), 796.15 (36.1%), 797.15 (7.8%).

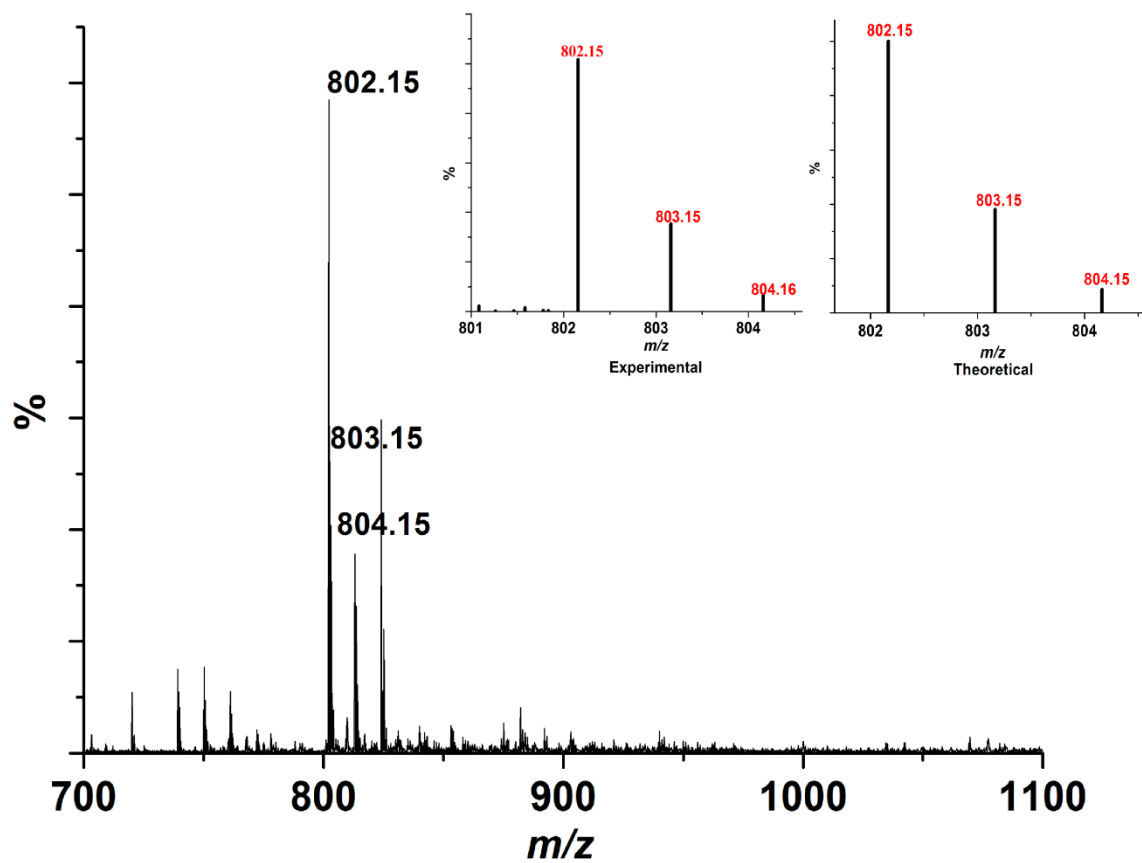

**Figure S3.** ESI-MS of complex **3** in aqueous DMF:  $m/z$  [**3**-DMF + H]<sup>+</sup>; calcd. for C<sub>33</sub>H<sub>35</sub>N<sub>7</sub>O<sub>8</sub>Tb (relative abundance): 802.15 (100.0%), 803.15 (35.3%), 804.15 (8.5%). Found: 802.15 (100.0%), 803.15 (37.5%), 804.15 (7.5%).

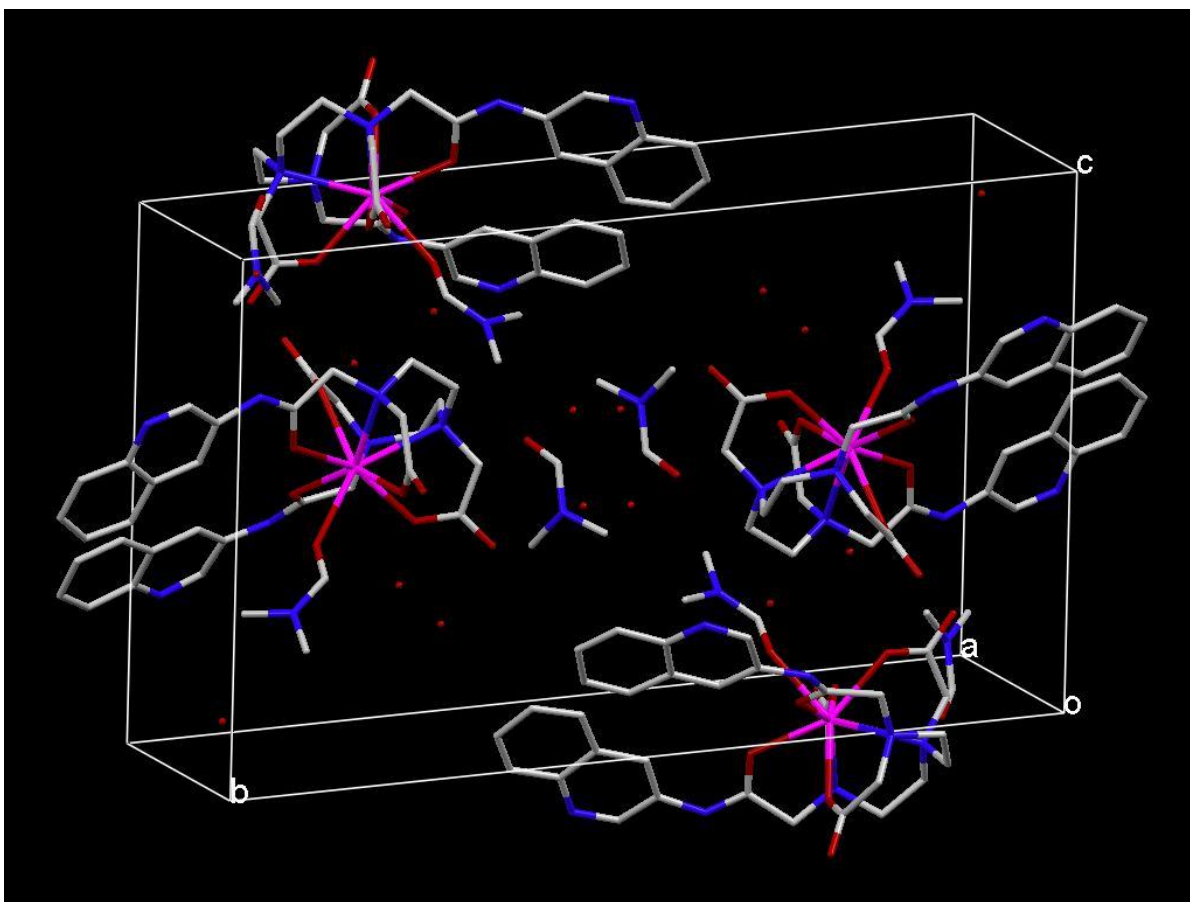

**Figure S4.** Unit cell packing diagram of [Pr(DTPAAQ)(DMF)] (1) along b-axis.



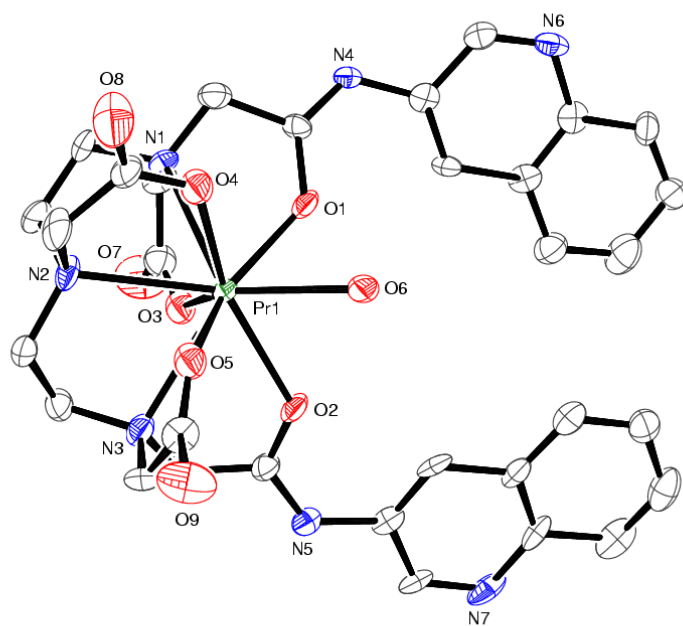

**Figure S5.** ORTEP view of  $[\text{Pr}(\text{DTPAAQ})(\text{H}_2\text{O})]$  (**1a**) with 50% probability thermal ellipsoid with atom labelling scheme for the metal and heteroatoms.

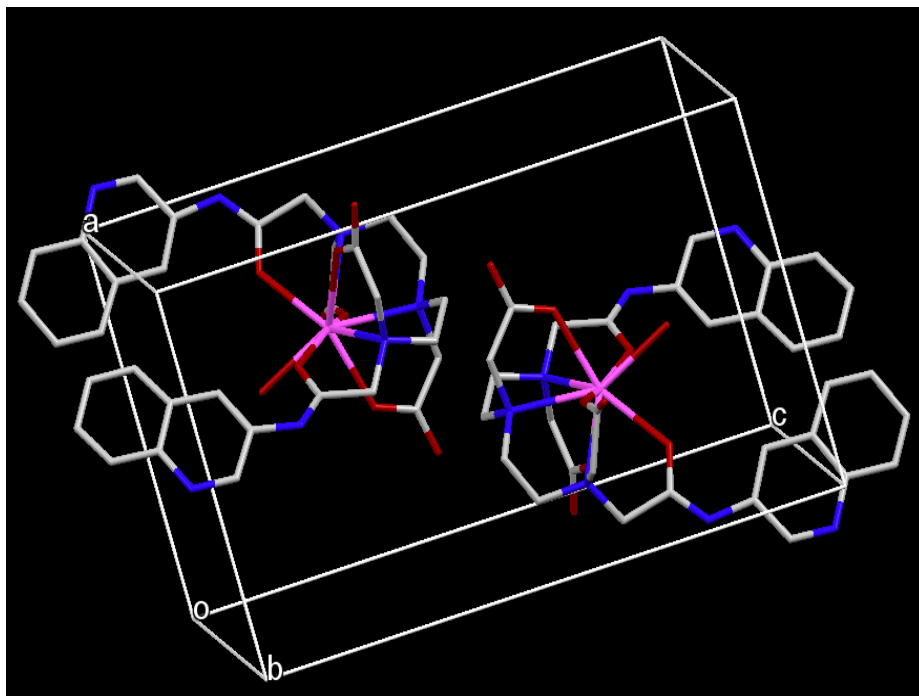

**Figure S6.** Unit cell packing diagram of [Pr(DTPAAQ)(H<sub>2</sub>O)] (**1a**) along b-axis.

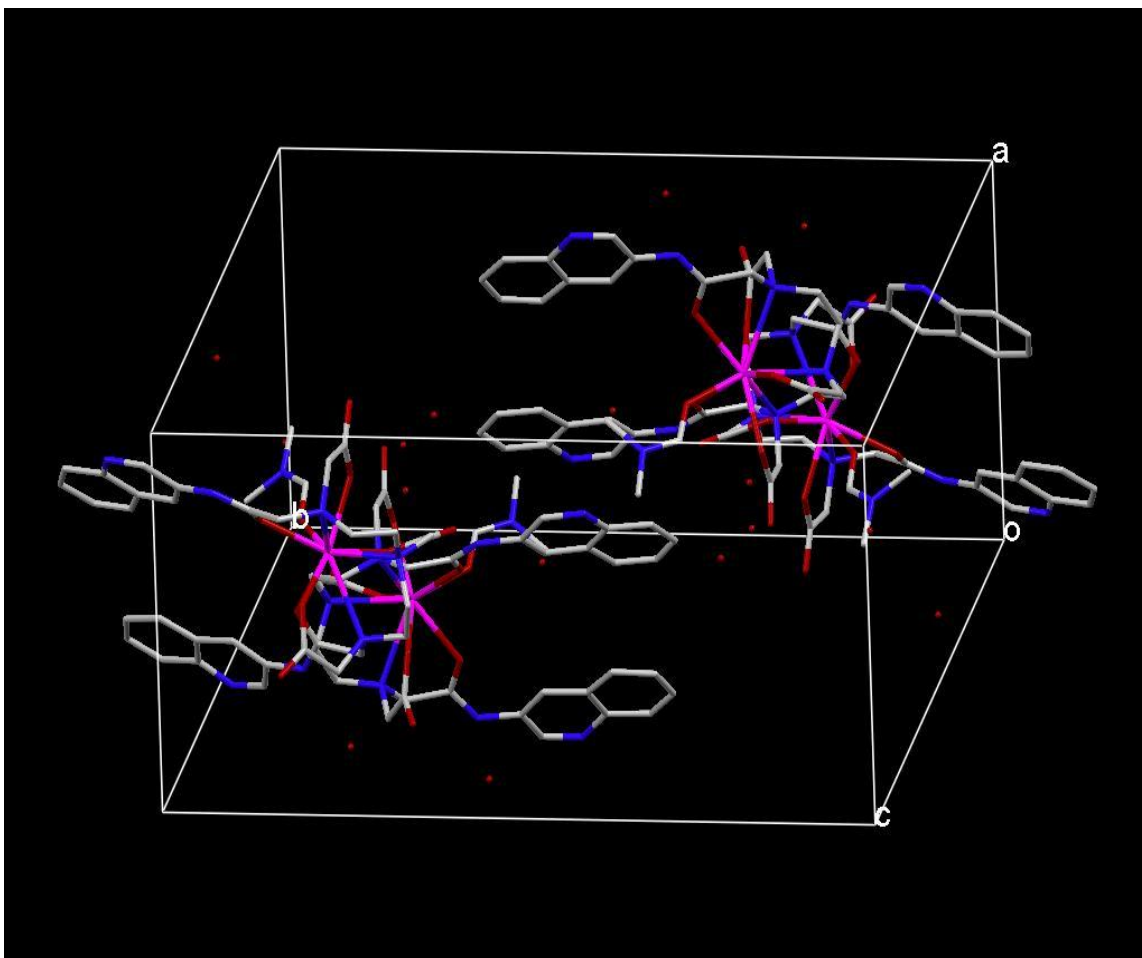

**Figure S7.** Unit cell packing diagram of [Eu(DTPAAQ)(DMF)] (**2**) along b-axis.

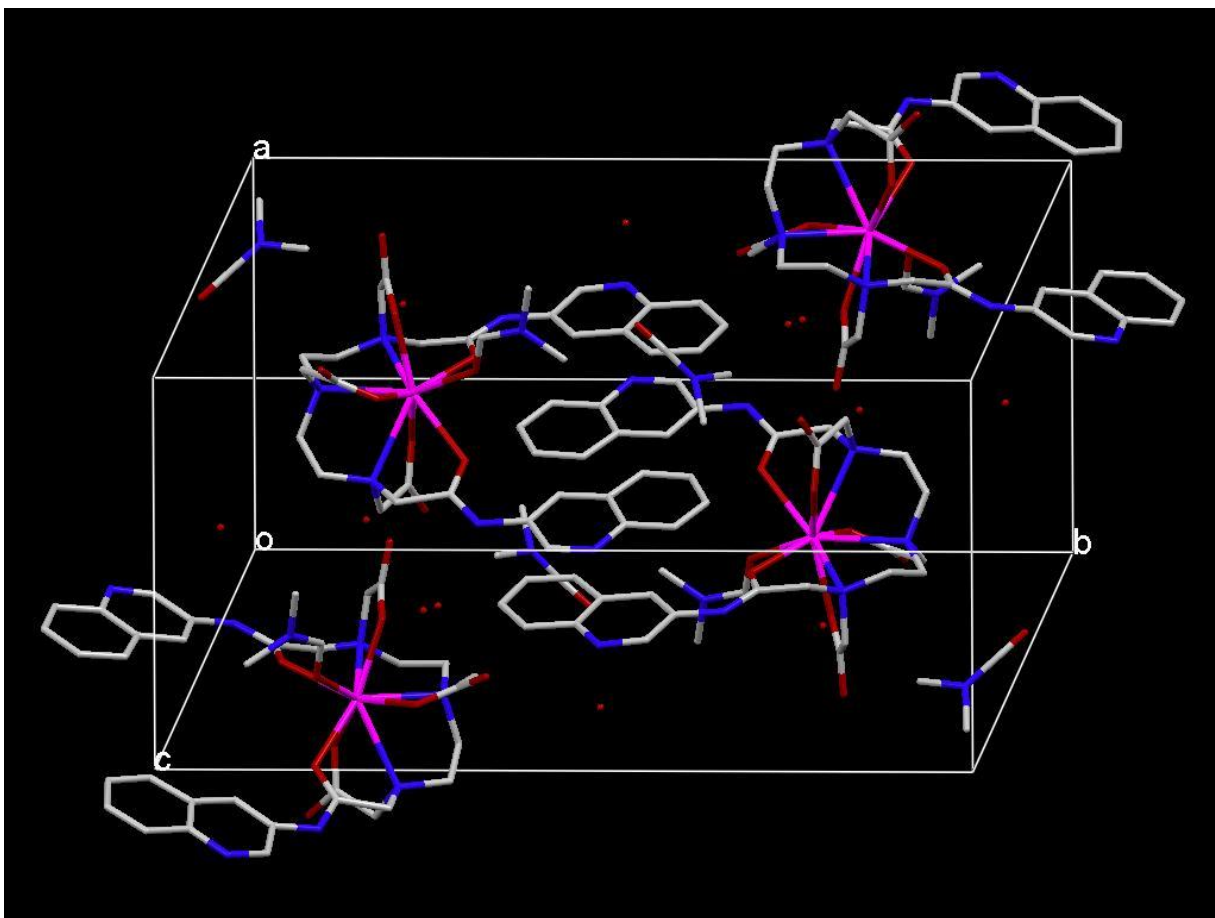

**Figure S8.** Unit cell packing diagram of [Tb(DTPAAQ)(DMF)] (**3**) along b-axis.

**Table S1.** Crystal data and structural refinement details for complexes **1a** and **1-3**.

| Parameters                                                                   | <b>1·DMF·4H<sub>2</sub>O</b>                                      | <b>1a</b>                                                        | <b>2·4H<sub>2</sub>O</b>                                          | <b>3·DMF·3H<sub>2</sub>O</b>                                      |
|------------------------------------------------------------------------------|-------------------------------------------------------------------|------------------------------------------------------------------|-------------------------------------------------------------------|-------------------------------------------------------------------|
| Empirical Formula                                                            | C <sub>38</sub> H <sub>54</sub> N <sub>9</sub> O <sub>13</sub> Pr | C <sub>32</sub> H <sub>34</sub> N <sub>7</sub> O <sub>9</sub> Pr | C <sub>35</sub> H <sub>41</sub> N <sub>8</sub> O <sub>13</sub> Eu | C <sub>38</sub> H <sub>52</sub> N <sub>9</sub> O <sub>13</sub> Tb |
| Formula weight                                                               | 985.81                                                            | 801.57                                                           | 933.72                                                            | 1001                                                              |
| Crystal system                                                               | Monoclinic                                                        | Triclinic                                                        | Monoclinic                                                        | Monoclinic                                                        |
| Space group                                                                  | <i>P2<sub>1</sub>/c</i>                                           | <i>P</i> -1                                                      | <i>P2<sub>1</sub>/n</i>                                           | <i>P2<sub>1</sub>/n</i>                                           |
| <i>a</i> , Å                                                                 | 11.343(5)                                                         | 10.085(5)                                                        | 11.132(2)                                                         | 10.9299(4)                                                        |
| <i>b</i> , Å                                                                 | 23.530(5)                                                         | 11.118(5)                                                        | 23.789(5)                                                         | 23.1611(10)                                                       |
| <i>c</i> , Å                                                                 | 16.714(5)                                                         | 18.036(5)                                                        | 17.045(3)                                                         | 17.1891(8)                                                        |
| $\gamma$ , deg                                                               | 90.0                                                              | 98.989(5)                                                        | 90.0                                                              | 90.0                                                              |
| $\beta$ , deg                                                                | 109.356(5)                                                        | 93.383(5)                                                        | 108.57(3)                                                         | 108.1320(10)                                                      |
| $\gamma$ , deg                                                               | 90.0                                                              | 96.356(5)                                                        | 90.0                                                              | 90.0                                                              |
| <i>V</i> , Å <sup>3</sup>                                                    | 4209(2)                                                           | 1979.2(14)                                                       | 4279.0(15)                                                        | 4135.3(3)                                                         |
| <i>Z</i>                                                                     | 4                                                                 | 2                                                                | 4                                                                 | 4                                                                 |
| $\rho_{\text{calcd}}$ , g/cm <sup>-3</sup>                                   | 1.556                                                             | 1.345                                                            | 1.449                                                             | 1.609                                                             |
| <i>T</i> , K                                                                 | 100(2)                                                            | 293(2)                                                           | 293(2)                                                            | 100(2)                                                            |
| Absorption coeff.,<br>$\mu$ , mm <sup>-1</sup>                               | 1.233                                                             | 1.285                                                            | 1.534                                                             | 1.786                                                             |
| $\theta$ limits, deg                                                         | 2.09 – 26.00                                                      | 2.29 – 25.00                                                     | 1.52 – 25.49                                                      | 2.15 – 28.28                                                      |
| No. of measured reflections                                                  | 39462                                                             | 7688                                                             | 31403                                                             | 36308                                                             |
| No. of unique reflections                                                    | 8264                                                              | 5998                                                             | 7968                                                              | 10258                                                             |
| No. of observed reflections                                                  | 5852                                                              | 4293                                                             | 6030                                                              | 7689                                                              |
| [ <i>I</i> > 2 $\sigma$ ( <i>I</i> )]                                        |                                                                   |                                                                  |                                                                   |                                                                   |
| no. of parameters                                                            | 559                                                               | 440                                                              | 514                                                               | 550                                                               |
| GOF on <i>F</i> <sup>2</sup>                                                 | 1.017                                                             | 1.043                                                            | 1.041                                                             | 1.048                                                             |
| <i>R</i> <sub>1</sub> [ <i>I</i> > 2 $\sigma$ ( <i>I</i> )] <sup>a</sup> , % | 4.97                                                              | 10.91                                                            | 5.48                                                              | 4.54                                                              |
| <i>wR</i> <sub>2</sub> <sup>b</sup> , %                                      | 12.19                                                             | 26.24                                                            | 17.46                                                             | 11.05                                                             |
| max, min peaks,<br>e/Å <sup>3</sup>                                          | 1.255 and<br>-0.812                                               | 3.716 and<br>-2.168                                              | 1.919 and -<br>0.723                                              | 2.417 and<br>-1.531                                               |

<sup>[a]</sup>  $R_1 = \sum ||F_o| - |F_c|| / \sum |F_o|$ ; <sup>[b]</sup>  $wR_2 = \{ \sum [w(F_o^2 - F_c^2)] / \sum [w(F_o^2)^2] \}^{1/2}$

**Table S2.** Selected bond distances (Å) and bond angles (deg) for [Pr(DTPAAQ)(DMF)]•DMF•3H<sub>2</sub>O (**1**)

|                 |            |                 |            |
|-----------------|------------|-----------------|------------|
| Pr(1)-O(1)      | 2.508(4)   | O(5)-Pr(1)-O(1) | 78.18(15)  |
| Pr(1)-O(2)      | 2.519(4)   | O(5)-Pr(1)-O(2) | 77.71(15)  |
| Pr(1)-O(3)      | 2.404(4)   | O(2)-Pr(1)-N(3) | 59.71(14)  |
| Pr(1)-O(4)      | 2.422(4)   | O(3)-Pr(1)-N(1) | 64.89(13)  |
| Pr(1)-O(5)      | 2.419(4)   | O(3)-Pr(1)-N(2) | 78.31(15)  |
| Pr(1)-O(6)      | 2.454(4)   | O(3)-Pr(1)-N(3) | 138.66(14) |
| Pr(1)-N(1)      | 2.736(4)   | O(5)-Pr(1)-N(1) | 70.98(15)  |
| Pr(1)-N(2)      | 2.698(4)   | O(5)-Pr(1)-O(4) | 131.32(14) |
| Pr(1)-N(3)      | 2.825(5)   | O(5)-Pr(1)-O(6) | 132.17(14) |
| O(1)-Pr(1)-O(2) | 96.16(13)  | O(6)-Pr(1)-O(1) | 73.62(13)  |
| O(3)-Pr(1)-O(1) | 82.28(13)  | O(6)-Pr(1)-O(2) | 68.01(14)  |
| O(3)-Pr(1)-O(2) | 144.01(13) | O(1)-Pr(1)-N(1) | 62.50(13)  |
| O(3)-Pr(1)-O(4) | 76.18(13)  | O(1)-Pr(1)-N(2) | 129.54(13) |
| O(3)-Pr(1)-O(5) | 135.86(13) | O(1)-Pr(1)-N(3) | 137.08(15) |
| O(3)-Pr(1)-O(6) | 77.21(13)  | O(2)-Pr(1)-N(1) | 144.86(15) |
| O(4)-Pr(1)-O(1) | 150.43(14) | O(5)-Pr(1)-N(2) | 84.35(14)  |
| O(4)-Pr(1)-O(2) | 89.75(14)  | O(5)-Pr(1)-N(3) | 63.00(15)  |
| O(4)-Pr(1)-O(6) | 81.95(13)  |                 |            |

**Table S3.** Selected bond distances (Å) and bond angles (deg) for [Pr(DTPAAQ)(H<sub>2</sub>O)] (**1a**)

|                   |           |                  |           |
|-------------------|-----------|------------------|-----------|
| Pr(1)-O(1)        | 2.464(9)  | O(4)-Pr(1)-O(2)  | 88.2(6)   |
| Pr(1)-O(2)        | 2.397(18) | O(4)-Pr(1)-O(5)  | 131.2(5)  |
| Pr(1)-O(2A)       | 1.85(4)   | O(4)-Pr(1)-O(6)  | 83.0(5)   |
| Pr(1)-O(3)        | 1.810(16) | O(5)-Pr(1)-O(1)  | 77.2(4)   |
| Pr(1)-O(3A)       | 2.32(4)   | O(5)-Pr(1)-O(6)  | 133.7(4)  |
| Pr(1)-O(4)        | 2.372(19) | O(3)-Pr(1)-N(1)  | 47.1(6)   |
| Pr(1)-O(5)        | 2.409(12) | O(1)-Pr(1)-N(1)  | 61.8(4)   |
| Pr(1)-O(6)        | 2.520(10) | O(1)-Pr(1)-N(2)  | 128.1(4)  |
| Pr(1)-N(1)        | 2.760(12) | O(1)-Pr(1)-N(3)  | 134.4(3)  |
| Pr(1)-N(2)        | 2.683(9)  | O(2)-Pr(1)-N(1)  | 146.1(5)  |
| Pr(1)-N(3)        | 2.798(11) | O(2)-Pr(1)-N(2)  | 126.7(5)  |
| O(1)-Pr(1)-O(6)   | 72.4(4)   | O(2)-Pr(1)-N(3)  | 59.1(4)   |
| O(2)-Pr(1)-O(1)   | 96.3(5)   | O(2A)-Pr(1)-N(1) | 135.9(12) |
| O(2)-Pr(1)-O(5)   | 80.4(5)   | O(2A)-Pr(1)-N(2) | 120.5(12) |
| O(2)-Pr(1)-O(6)   | 69.4(5)   | O(2A)-Pr(1)-N(3) | 52.4(11)  |
| O(2A)-Pr(1)-O(1)  | 95.1(12)  | O(3)-Pr(1)-N(1)  | 47.1(6)   |
| O(2A)-Pr(1)-O(2)  | 12.3(12)  | O(3)-Pr(1)-N(2)  | 61.5(6)   |
| O(2A)-Pr(1)-O(3A) | 155.1(15) | O(3)-Pr(1)-N(3)  | 129.3(5)  |
| O(2A)-Pr(1)-O(4)  | 94.9(13)  | O(3A)-Pr(1)-N(1) | 65.0(9)   |
| O(2A)-Pr(1)-O(5)  | 68.2(13)  | O(3A)-Pr(1)-N(2) | 77.5(9)   |
| O(2A)-Pr(1)-O(6)  | 80.6(12)  | O(3A)-Pr(1)-N(3) | 139.4(9)  |
| O(3)-Pr(1)-O(1)   | 85.2(5)   | O(4)-Pr(1)-N(1)  | 123.7(5)  |
| O(3)-Pr(1)-O(2)   | 164.2(6)  | O(4)-Pr(1)-N(2)  | 67.0(5)   |
| O(3)-Pr(1)-O(2A)  | 176.5(13) | O(4)-Pr(1)-N(3)  | 71.4(5)   |
| O(3)-Pr(1)-O(3A)  | 21.5(9)   | O(5)-Pr(1)-N(1)  | 70.1(4)   |
| O(3)-Pr(1)-O(4)   | 83.3(7)   | O(5)-Pr(1)-N(2)  | 82.6(4)   |
| O(3)-Pr(1)-O(5)   | 115.2(6)  | O(5)-Pr(1)-N(3)  | 62.1(4)   |
| O(3)-Pr(1)-O(6)   | 96.3(6)   | O(6)-Pr(1)-N(1)  | 120.9(3)  |
| O(3A)-Pr(1)-O(1)  | 84.2(9)   | O(6)-Pr(1)-N(2)  | 143.7(4)  |
| O(3A)-Pr(1)-O(2)  | 142.8(10) | O(6)-Pr(1)-N(3)  | 122.1(3)  |
| O(3A)-Pr(1)-O(4)  | 75.6(10)  | N(1)-Pr(1)-N(3)  | 116.5(3)  |
| O(3A)-Pr(1)-O(5)  | 135.0(9)  | N(2)-Pr(1)-N(1)  | 66.4(3)   |
| O(3A)-Pr(1)-O(6)  | 75.4(9)   | N(2)-Pr(1)-N(3)  | 68.3(4)   |
| O(4)-Pr(1)-O(1)   | 151.5(5)  |                  |           |

**Table S4.** Selected bond distances (Å) and bond angles (deg) for [Eu(DTPAAQ)(DMF)]•3H<sub>2</sub>O (2•3H<sub>2</sub>O)

|                 |            |                 |            |
|-----------------|------------|-----------------|------------|
| Eu(1)-O(1)      | 2.453(4)   | O(4)-Eu(1)-O(6) | 79.66(18)  |
| Eu(1)-O(2)      | 2.486(5)   | O(5)-Eu(1)-O(1) | 76.59(18)  |
| Eu(1)-O(3)      | 2.348(5)   | O(5)-Eu(1)-O(2) | 77.98(19)  |
| Eu(1)-O(4)      | 2.366(4)   | O(5)-Eu(1)-O(3) | 136.00(18) |
| Eu(1)-O(5)      | 2.339(5)   | O(5)-Eu(1)-O(4) | 132.53(18) |
| Eu(1)-O(6)      | 2.394(5)   | O(5)-Eu(1)-O(6) | 132.62(19) |
| Eu(1)-N(1)      | 2.689(6)   | O(6)-Eu(1)-O(1) | 73.86(17)  |
| Eu(1)-N(2)      | 2.636(5)   | O(6)-Eu(1)-O(2) | 67.59(18)  |
| Eu(1)-N(3)      | 2.759(6)   | O(2)-Eu(1)-N(3) | 60.38(17)  |
| O(1)-Eu(1)-O(2) | 93.00(16)  | O(3)-Eu(1)-N(1) | 65.32(18)  |
| O(3)-Eu(1)-O(1) | 84.53(18)  | O(5)-Eu(1)-N(3) | 63.99(19)  |
| O(3)-Eu(1)-O(2) | 143.16(17) | O(6)-Eu(1)-N(1) | 123.86(18) |
| O(3)-Eu(1)-O(4) | 76.40(17)  | O(6)-Eu(1)-N(2) | 140.73(19) |
| O(3)-Eu(1)-O(6) | 76.50(18)  | O(6)-Eu(1)-N(3) | 118.78(18) |
| O(4)-Eu(1)-O(1) | 150.33(17) | N(1)-Eu(1)-N(3) | 117.13(18) |
| O(4)-Eu(1)-O(2) | 89.04(17)  |                 |            |



**Table S5.** Selected bond distances (Å) and bond angles (deg) for [Tb(DTPAAQ)(DMF)]•DMF•3H<sub>2</sub>O (3•DMF•3H<sub>2</sub>O).

|                 |            |                 |            |
|-----------------|------------|-----------------|------------|
| Tb(1)-O(1)      | 2.419(3)   | O(6)-Tb(1)-O(1) | 72.92(11)  |
| Tb(1)-O(2)      | 2.463(3)   | O(6)-Tb(1)-O(2) | 67.39(11)  |
| Tb(1)-O(3)      | 2.334(3)   | O(1)-Tb(1)-N(1) | 64.06(11)  |
| Tb(1)-O(4)      | 2.338(3)   | O(1)-Tb(1)-N(2) | 132.20(11) |
| Tb(1)-O(5)      | 2.327(3)   | O(1)-Tb(1)-N(3) | 137.44(12) |
| Tb(1)-O(6)      | 2.358(3)   | O(2)-Tb(1)-N(1) | 143.15(11) |
| Tb(1)-N(1)      | 2.662(4)   | O(2)-Tb(1)-N(3) | 61.48(11)  |
| Tb(1)-N(2)      | 2.626(4)   | O(3)-Tb(1)-N(1) | 66.08(11)  |
| Tb(1)-N(3)      | 2.728(4)   | O(3)-Tb(1)-N(2) | 75.74(12)  |
| O(1)-Tb(1)-O(2) | 91.42(10)  | O(3)-Tb(1)-N(3) | 137.02(12) |
| O(3)-Tb(1)-O(1) | 84.70(11)  | O(4)-Tb(1)-N(1) | 126.25(11) |
| O(3)-Tb(1)-O(2) | 142.53(11) | O(4)-Tb(1)-N(2) | 67.47(12)  |
| O(3)-Tb(1)-O(4) | 74.91(11)  | O(4)-Tb(1)-N(3) | 69.95(12)  |
| O(3)-Tb(1)-O(6) | 75.90(11)  | O(5)-Tb(1)-N(1) | 71.56(12)  |
| O(4)-Tb(1)-O(1) | 147.08(11) | O(5)-Tb(1)-N(2) | 88.27(13)  |
| O(4)-Tb(1)-O(2) | 89.51(11)  | O(5)-Tb(1)-N(3) | 65.17(13)  |
| O(4)-Tb(1)-O(6) | 77.15(11)  | O(6)-Tb(1)-N(1) | 123.79(11) |
| O(5)-Tb(1)-O(1) | 77.55(12)  | O(6)-Tb(1)-N(3) | 117.98(12) |
| O(5)-Tb(1)-O(2) | 76.70(12)  | N(1)-Tb(1)-N(3) | 118.12(12) |
| O(5)-Tb(1)-O(3) | 137.64(12) | N(2)-Tb(1)-N(1) | 68.14(12)  |
| O(5)-Tb(1)-O(4) | 134.33(12) | N(2)-Tb(1)-N(3) | 68.50(12)  |
| O(5)-Tb(1)-O(6) | 132.12(12) |                 |            |

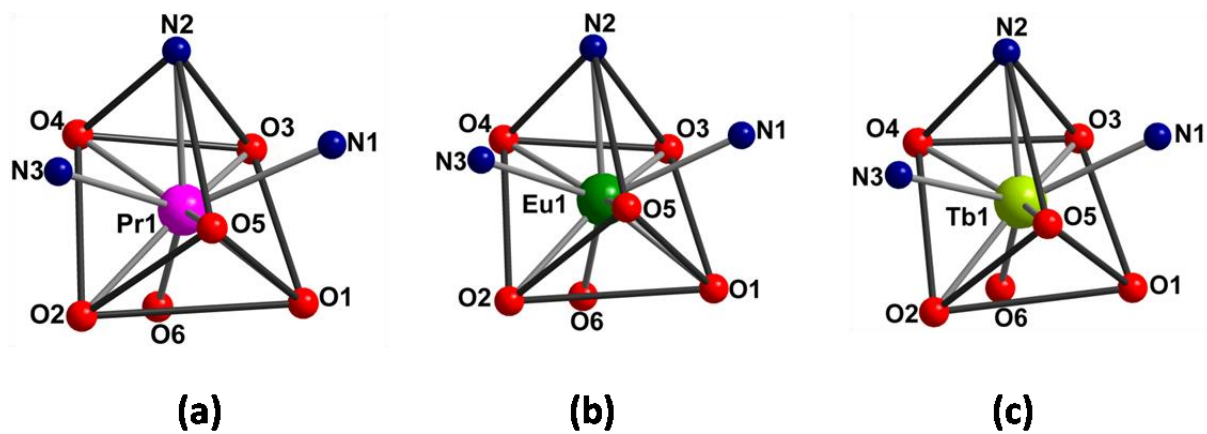

**Figure S9.** Coordination polyhedra of the nine-coordinate  $\{LnN_3O_6\}$  lanthanide cores showing tricapped-trigonal prism (TTP) coordination geometry in complexes **1** (a), **2** (b), and **3** (c).

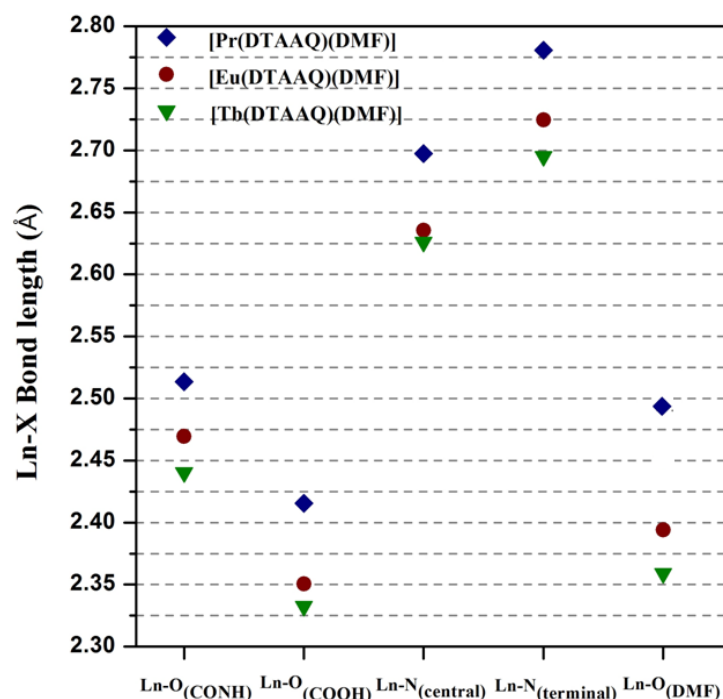

**Figure S10.** Variation of Ln-X (X=O, N) bond lengths in [Ln(DTPAAQ)(DMF)] (**1-3**) for {LnN<sub>3</sub>O<sub>6</sub>} core. Average bond distances were taken from similar set of bonds.

Respective bond distances are shown in table below.

| Bond Distance                                                                               | [Pr(DTPAAQ)(DMF)] | [Eu(DTPAAQ)(DMF)] | [Tb(DTPAAQ)(DMF)] |
|---------------------------------------------------------------------------------------------|-------------------|-------------------|-------------------|
|                                                                                             | (1)               | (2)               | (3)               |
| Ln-O1 (CONH)                                                                                | 2.508(4)          | 2.453(4)          | 2.419(3)          |
| Ln-O2 (CONH)                                                                                | 2.519(4)          | 2.486 (5)         | 2.463(3)          |
| Ln-O3 (COOH)                                                                                | 2.404(4)          | 2.348(5)          | 2.334(3)          |
| Ln-O4 (COOH)                                                                                | 2.422(4)          | 2.366(4)          | 2.338(3)          |
| Ln-O5 (COOH)                                                                                | 2.421(4)          | 2.339(5)          | 2.327(3)          |
| Ln-N(NCH <sub>2</sub> CH <sub>2</sub> N <sub>2</sub> CH <sub>2</sub> CH <sub>2</sub> N)     | 2.697(4)          | 2.636(5)          | 2.625(4)          |
| Ln -N(-NHCH <sub>2</sub> CH <sub>2</sub> N <sub>1</sub> CH <sub>2</sub> CH <sub>2</sub> N-) | 2.737(4)          | 2.689(6)          | 2.662(4)          |
| Ln -N(-NHCH <sub>2</sub> CH <sub>2</sub> N <sub>3</sub> CH <sub>2</sub> CH <sub>2</sub> N-) | 2.824(5)          | 2.759(6)          | 2.728(4)          |
| Ln-O(DMF)                                                                                   | 2.453(4)          | 2.394(5)          | 2.358(3)          |

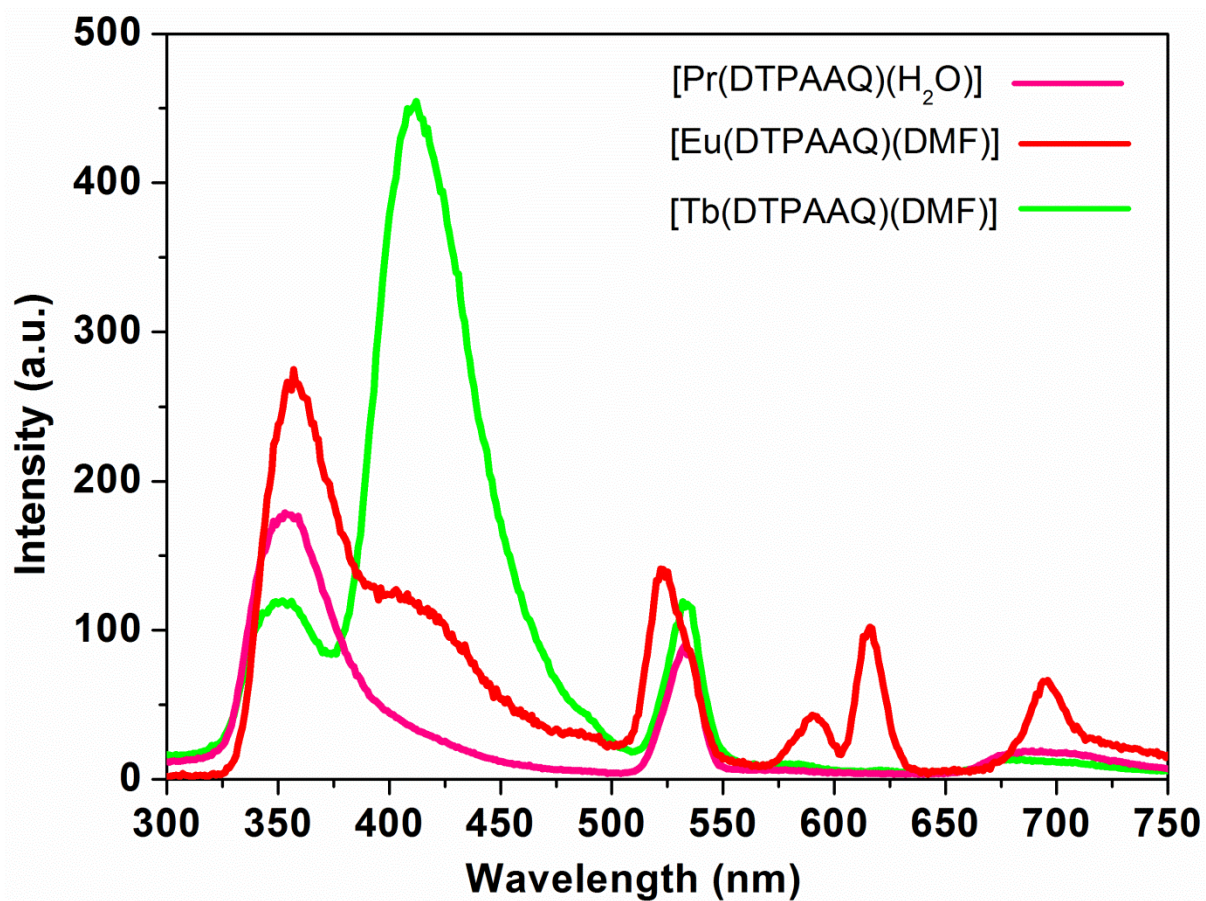

**Figure S11.** Overlay of steady state luminescence spectra of [Pr(DTPAAQ)(DMF)] (1), [Eu(DTPAAQ)(DMF)] (2), and [Tb(DTPAAQ)(DMF)] (3) in aqueous - DMF at  $\lambda_{\text{ex}}= 262$  nm with slit width of 5 nm. Note: The band at 524 nm arises due to second order Rayleigh scattering.

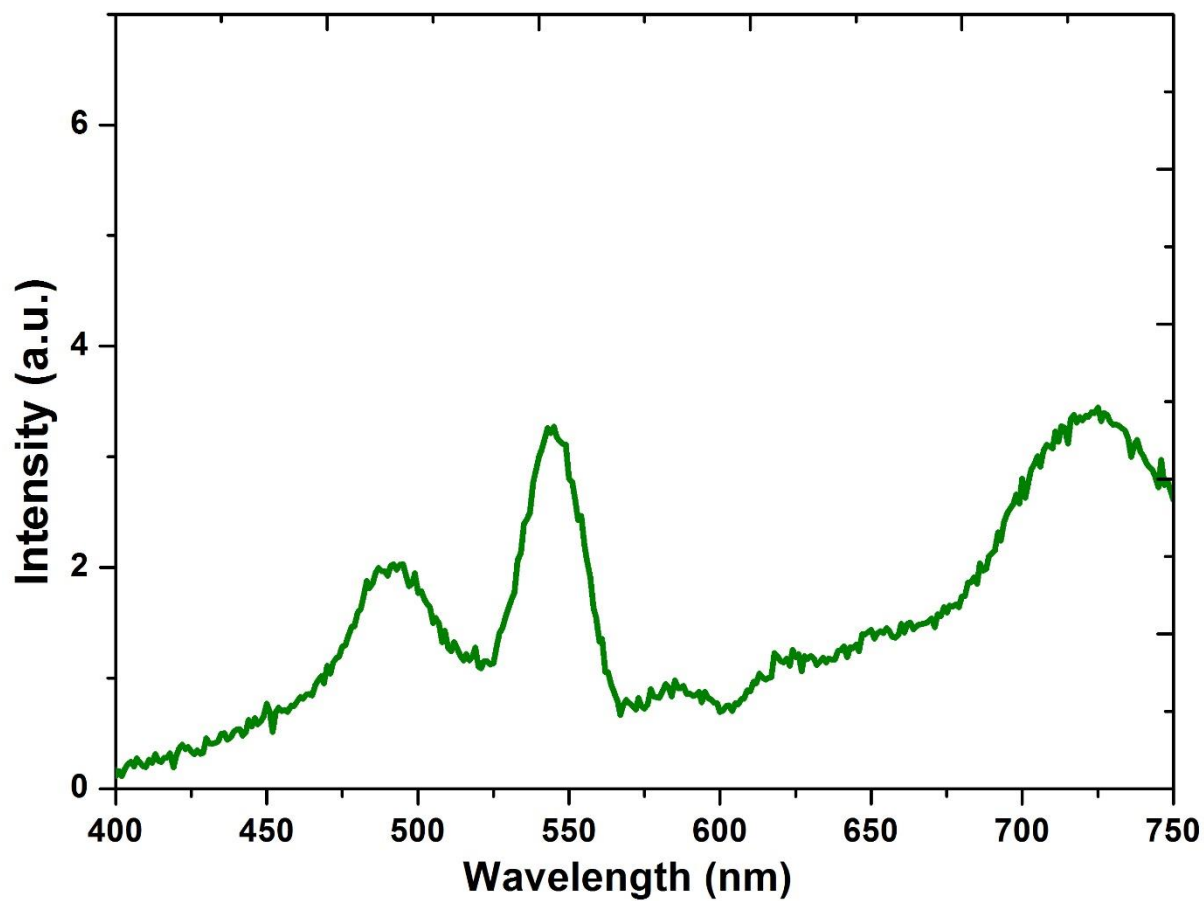

**Figure S12.** Time-resolved luminescence spectra of [Pr(DTPAAQ)(DMF)] (1) in DMF at 298 K. Delay time = 0.1 ms,  $\lambda_{\text{ex}} = 330$  nm, slit width= 5 nm.

**Table S6.** Luminescence lifetime ( $\tau$ )<sup>a</sup>, determination of inner-sphere hydration number ( $q$ )<sup>b</sup> of the complexes in H<sub>2</sub>O and D<sub>2</sub>O.

| Complex                        | $\lambda_{\text{ex}}$ (nm) | $\tau^{\text{H}_2\text{O}}$ (ms) | $\tau^{\text{D}_2\text{O}}$ (ms) | $q$  |
|--------------------------------|----------------------------|----------------------------------|----------------------------------|------|
| [Eu(DTPAAQ)(DMF)] ( <b>2</b> ) | 330 nm                     | 0.64                             | 1.81                             | 0.92 |
| [Tb(DTPAAQ)(DMF)] ( <b>3</b> ) | 330 nm                     | 0.51                             | 0.58                             | 0.88 |

<sup>a</sup> luminescence lifetime measured from decay curve profile from <sup>5</sup>D<sub>0</sub> and <sup>5</sup>D<sub>4</sub> excited states at 616 nm and 545 nm for Eu<sup>3+</sup> and Tb<sup>3+</sup> complexes respectively within experimental uncertainty of  $\pm 10\%$ . <sup>b</sup> $q$  is the number of water molecules coordinated to Ln<sup>3+</sup> ion in solution measured from modified Horrock's equation<sup>42</sup> described in experimental section of manuscript.

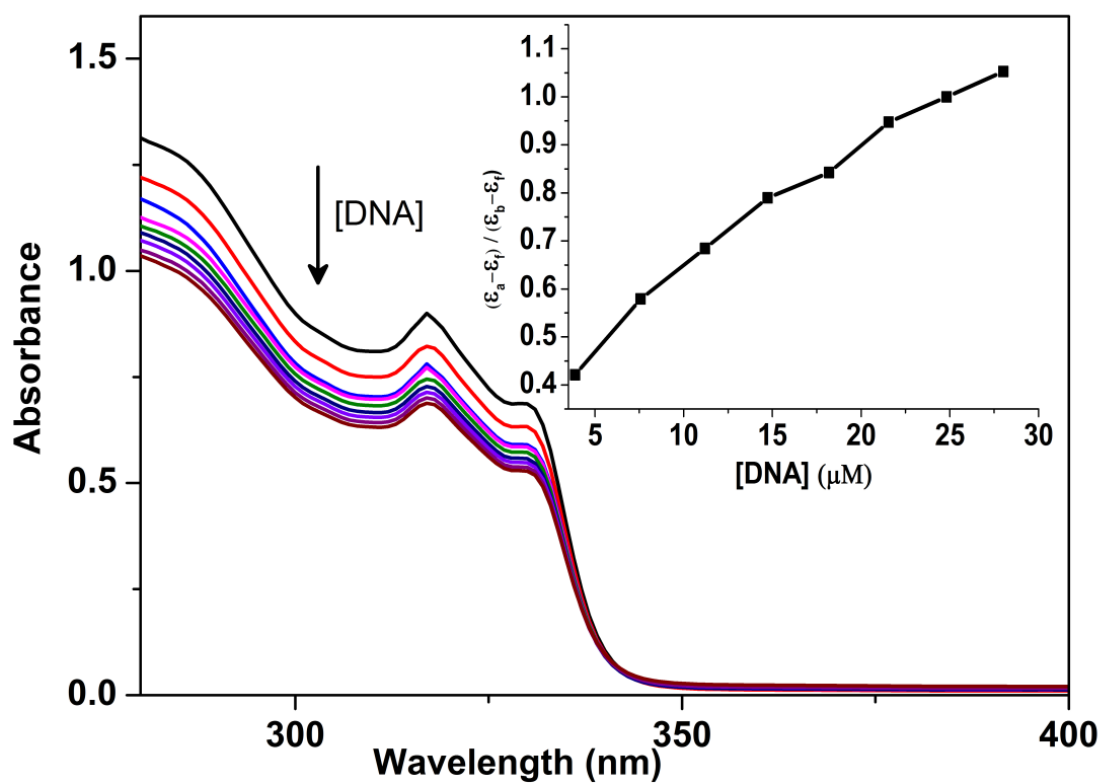

**Figure S14.** Absorption spectral traces of complex **1** in 5 mM Tris-HCl buffer (pH 7.2) on increasing amount of CT-DNA to solution of **1**. Inset figure shows plot of [DNA] versus  $\{(\epsilon_a - \epsilon_f) / (\epsilon_b - \epsilon_f)\}$ .

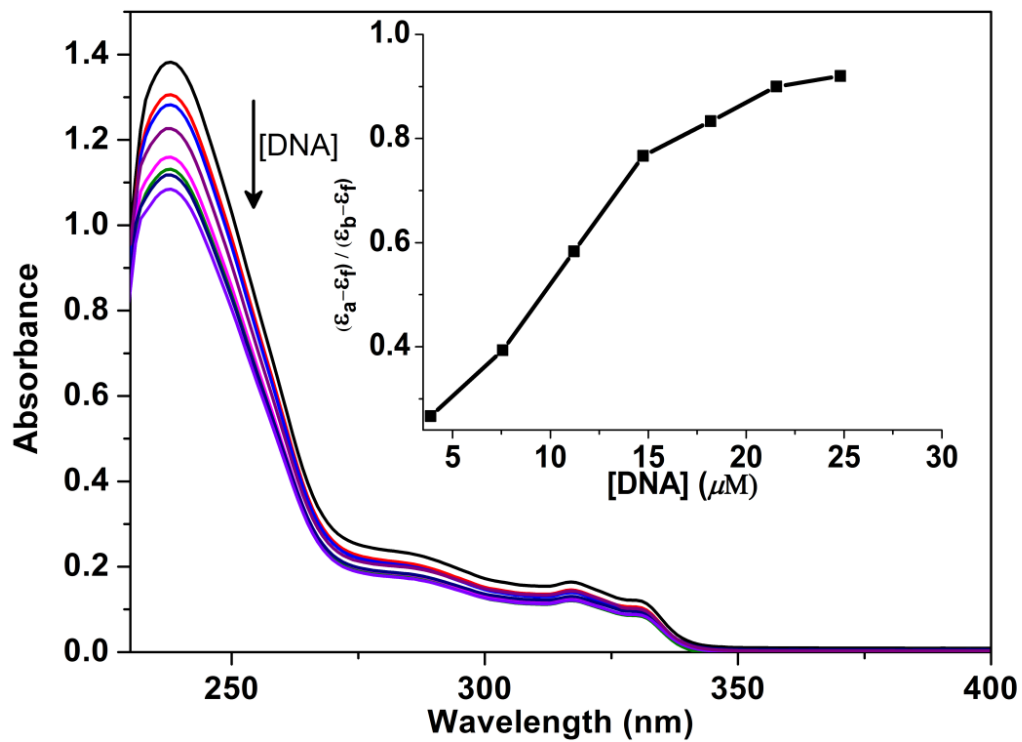

**Figure S15.** Absorption spectral traces of complex **2** in 5 mM Tris-HCl buffer (pH 7.2) on increasing amount of CT-DNA to a solution of **2**. Inset figure shows plot of [DNA] versus  $\{(\epsilon_a - \epsilon_f) / (\epsilon_b - \epsilon_f)\}$ .



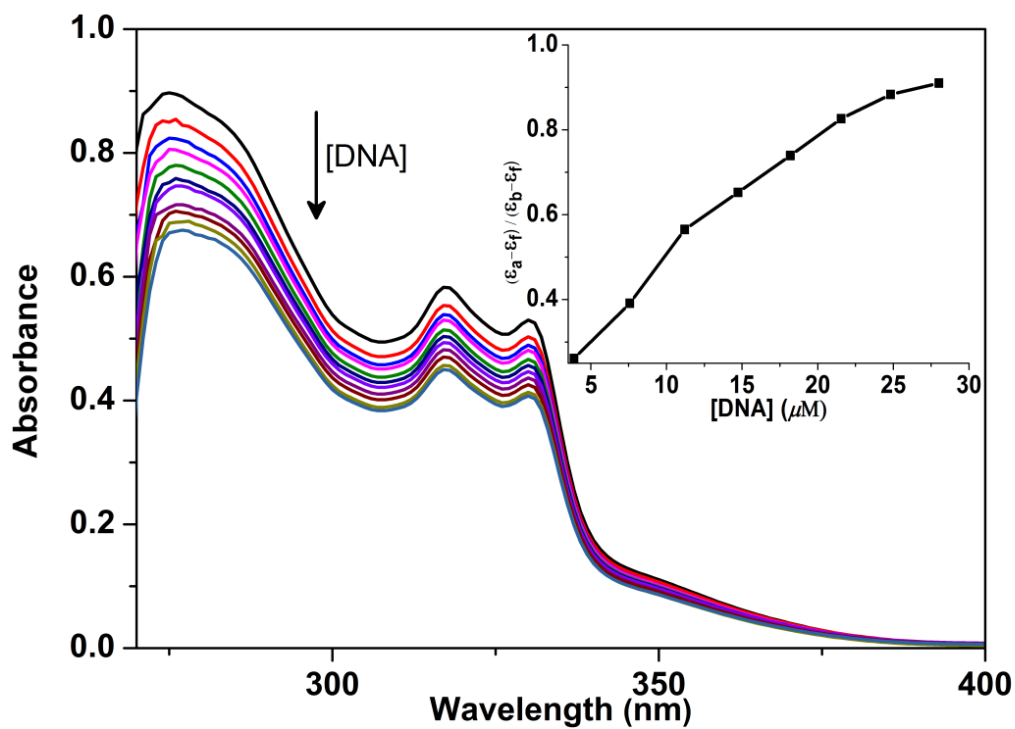

**Figure S16.** Absorption spectral traces of complex **3** in 5 mM Tris-HCl buffer (pH 7.2) on increasing amount of CT-DNA to solution of **3**. Inset figure shows plot of  $[DNA]$  versus  $\{(\epsilon_a - \epsilon_f) / (\epsilon_b - \epsilon_f)\}$ .

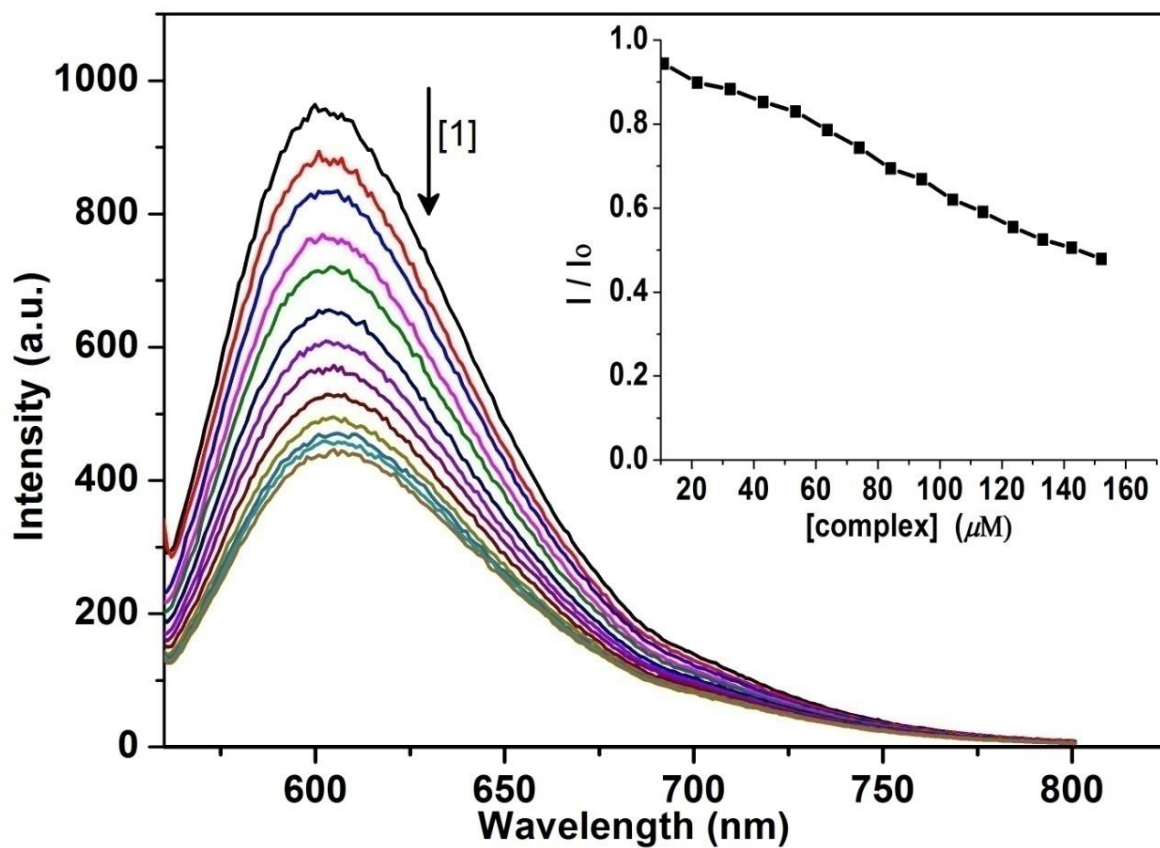

**Figure S17.** Emission spectral overlay plot for CT- bounded ethidium bromide (3 μM) in Tris-HCl buffer (5 mM, pH 7.2) with increasing concentration of [Pr(DTPAAQ)(DMF)] (1).

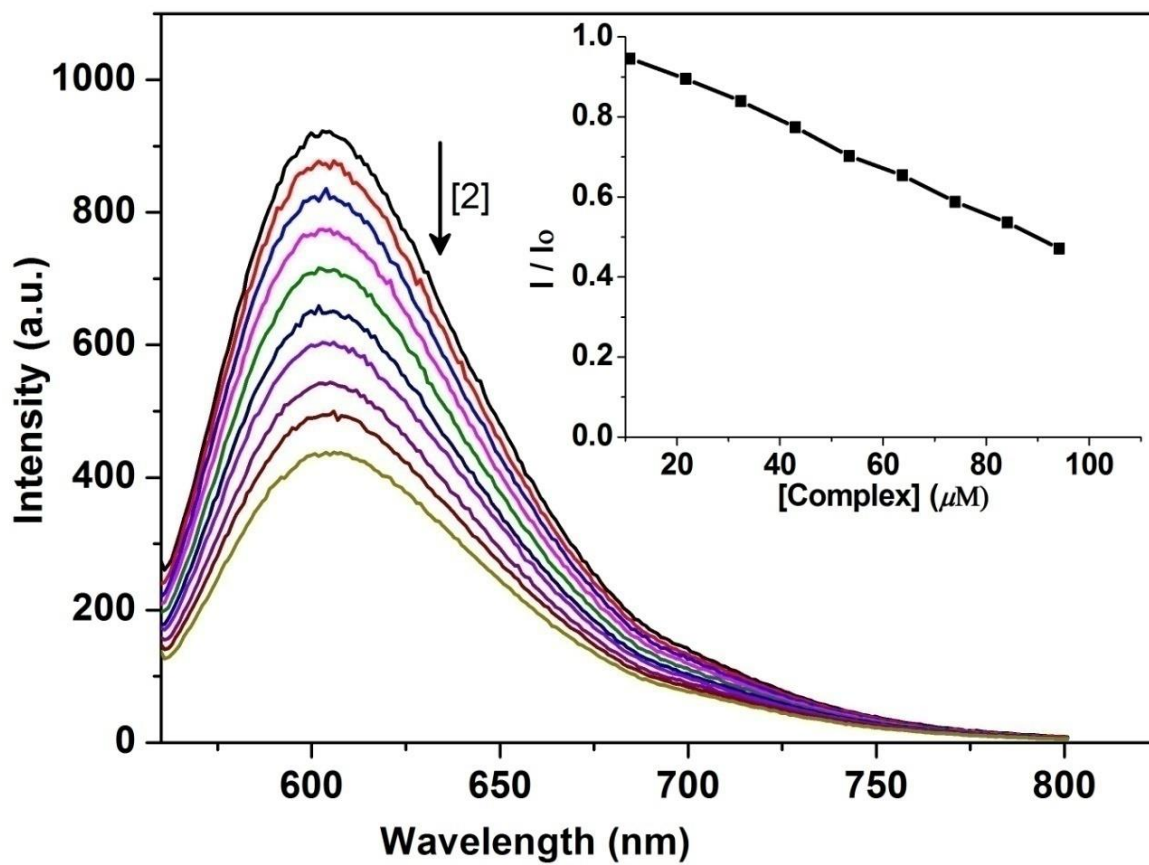

**Figure S18.** Emission spectral overlay plot for CT-bounded ethidium bromide (3 μM) in Tris-HCl buffer (5mM, pH7.2) with increasing concentration of [Pr(DTPAAQ)(DMF)] (2).

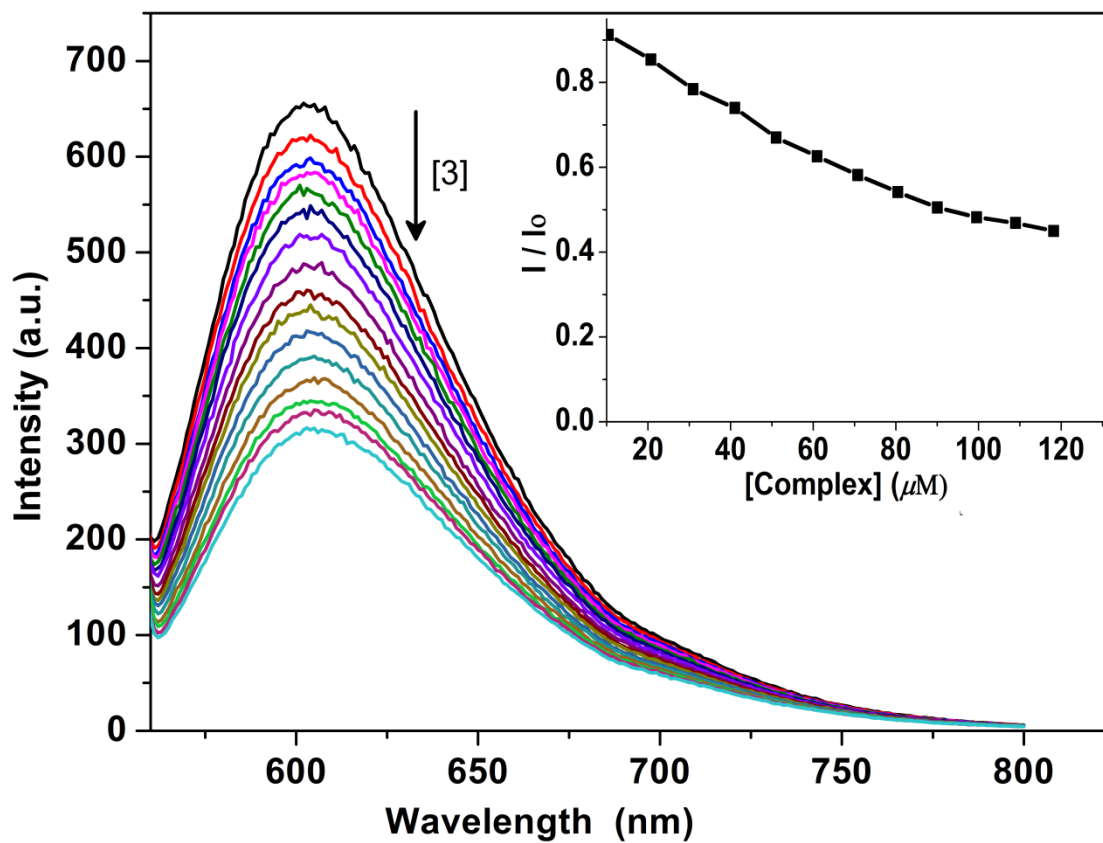

**Figure S19.** Emission spectral overlay plot for CT-DNA bounded ethidium bromide (3 μM) in Tris HCl-NaCl buffer (5mM, pH7.2) with increasing concentration of [Tb(DTPAAQ)(DMF)] (3).

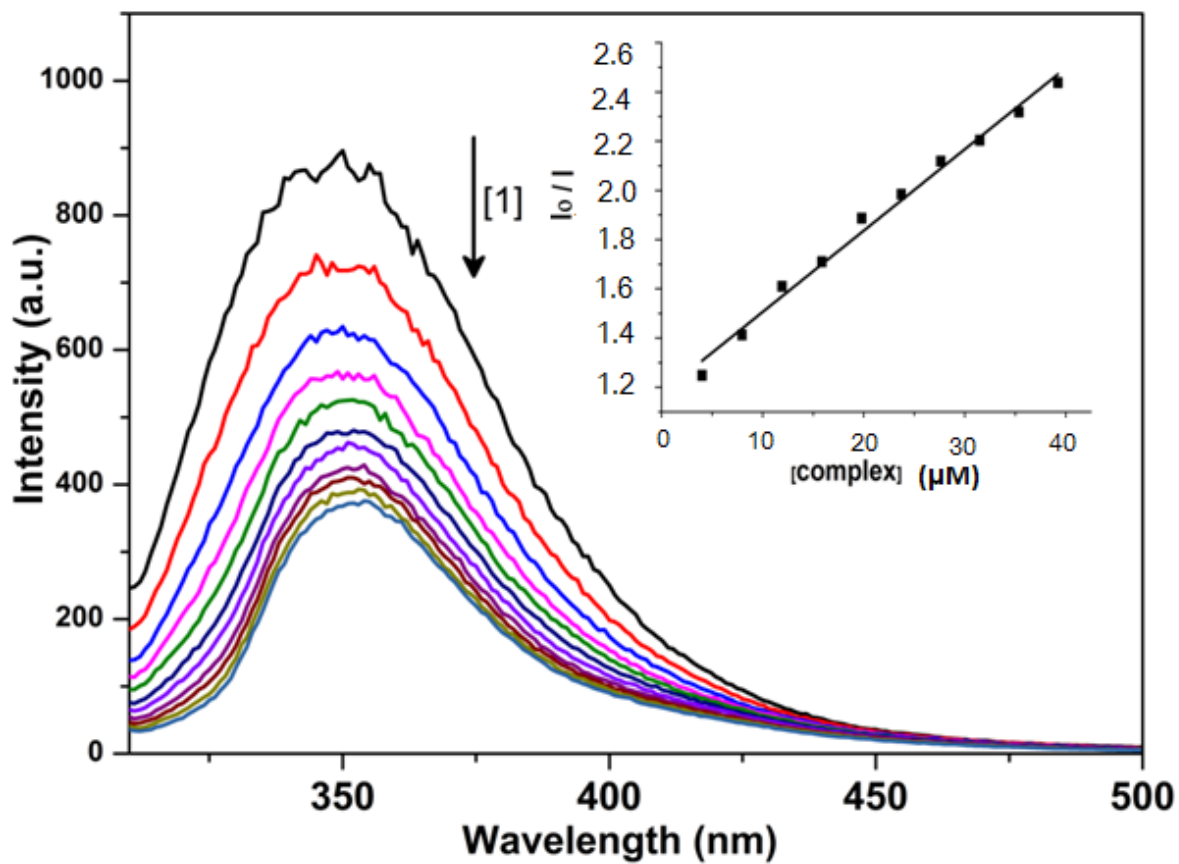

**Figure S20.** The effect of increasing concentration of [Pr(DTPAAQ)(DMF)] (1) on the fluorescence quenching of BSA (2  $\mu\text{M}$ ) in Tris HCl- NaCl (5mM, pH 7.2).  $\lambda_{\text{ex}} = 295 \text{ nm}$ ,  $\lambda_{\text{em}} = 340 \text{ nm}$ . The Inset shows the plot of  $I_0/I$  vs. [complex].

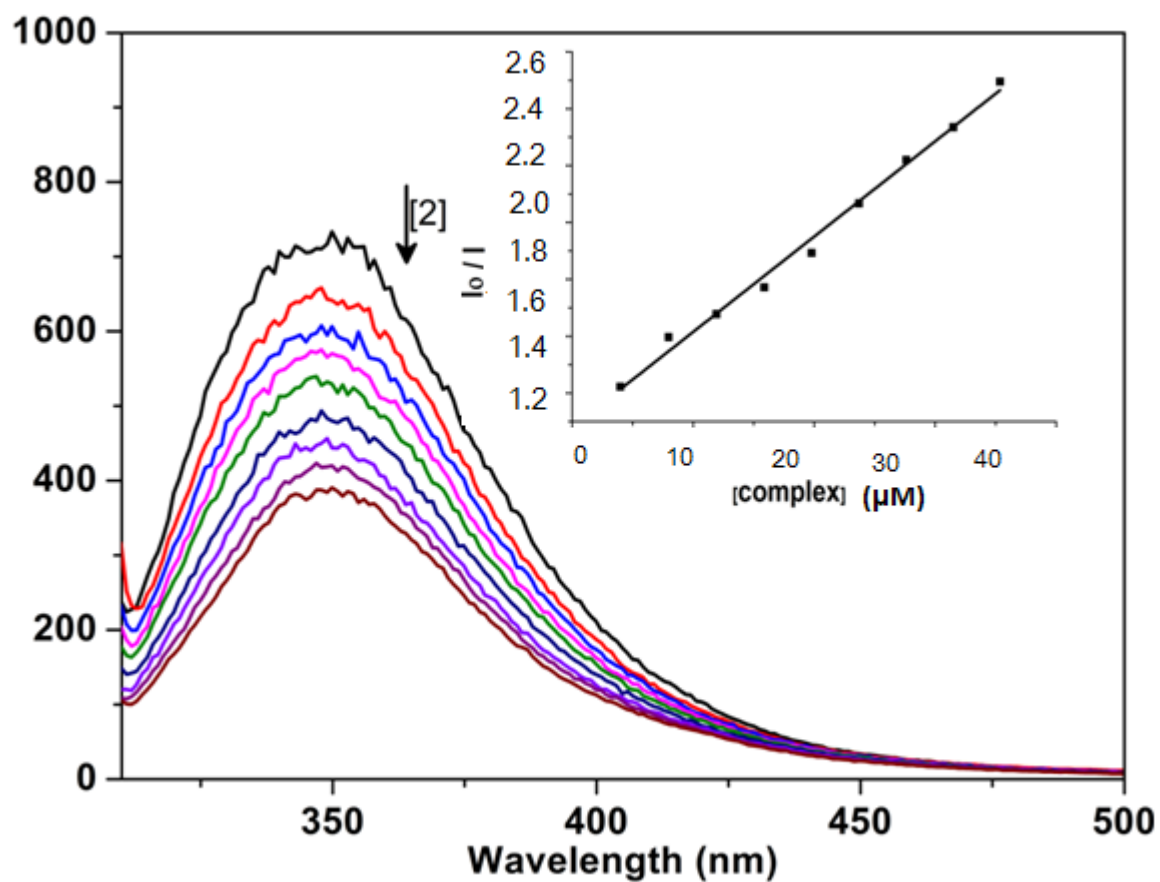

**Figure S21.** The effect of increasing concentration of [Eu(DTPAAQ)(DMF)] (**2**) on the fluorescence quenching of BSA ( $2 \mu\text{M}$ ) in Tris HCl- NaCl (5mM, pH 7.2).  $\lambda_{\text{ex}} = 295 \text{ nm}$ ,  $\lambda_{\text{em}} = 340 \text{ nm}$ . The Inset shows the plot of  $I_0/I$  vs. [complex].

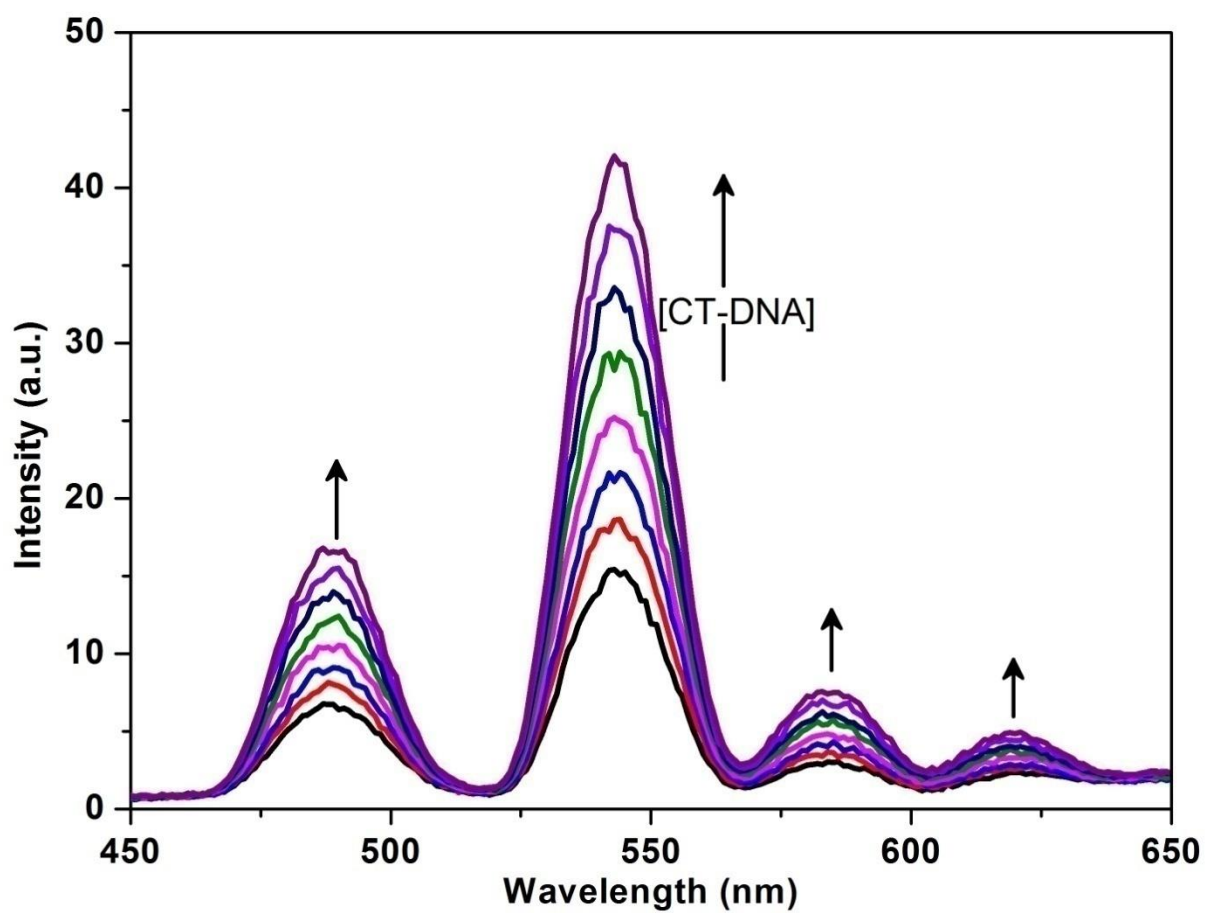

**Figure S22.** Time resolved luminescence spectra of complex [Tb(DTPAAQ)(DMF)] (**3**) (delay time = 0.1 ms,  $\lambda_{ex} = 330$  nm) in response to increasing concentration of CT-DNA in Tris HCl-NaCl buffer (5 mM, pH 7.2) at 298 K.

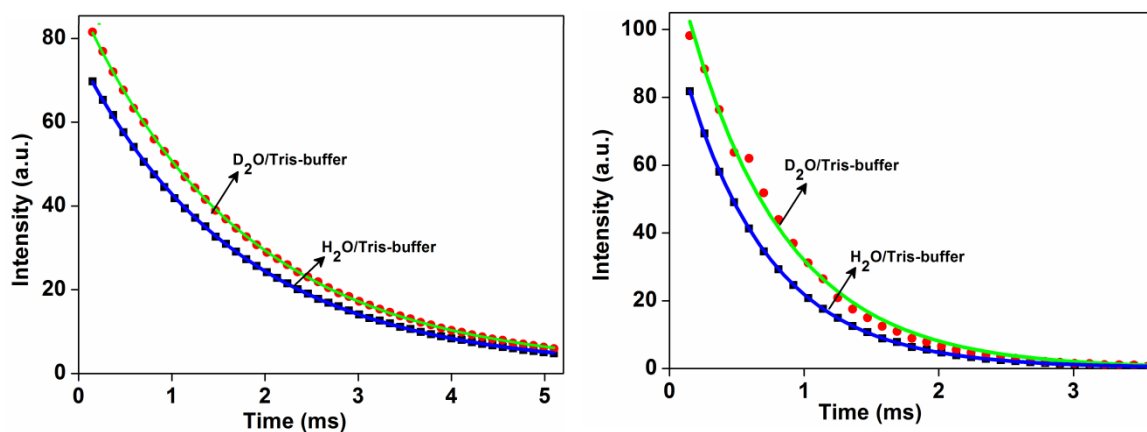

**Figure S23.** Luminescence decay profile from  $^5D_0$  state of Eu(III) in complex **2** and from  $^5D_4$  of Tb in complex **3** at  $\lambda_{em} = 616$  nm and 543 nm ( $\lambda_{ex} = 330$  nm) respectively in presence of CT-DNA in 5 mM Tris buffer in water (blue) and in D<sub>2</sub>O (green). [**2**] = 40  $\mu$ M, [DNA] = 60  $\mu$ M, delay time and gate time = 0.1 ms, Ex. and Em. slit = 10 nm. The solid lines are the best fits considering single-exponential behaviour of the decay.

**Table S7.** Luminescence lifetime ( $\tau$ )<sup>a</sup>, determination of inner-sphere hydration number ( $q$ ) in presence of CT-DNA.<sup>a</sup>

| Complex                        | $\lambda_{ex}$ (nm) | $\tau$ Tris buffer in H <sub>2</sub> O (ms) <sup>b</sup> | $\tau$ Tris buffer in D <sub>2</sub> O (ms) <sup>c</sup> | $q$   |
|--------------------------------|---------------------|----------------------------------------------------------|----------------------------------------------------------|-------|
| [Eu(DTPAAQ)(DMF)] ( <b>2</b> ) | 330 nm              | 0.950                                                    | 1.760                                                    | 0.290 |
| [Tb(DTPAAQ)(DMF)] ( <b>3</b> ) | 330 nm              | 0.565                                                    | 0.596                                                    | 0.160 |

<sup>a</sup> [complex] = 40  $\mu$ M, [DNA] = 60  $\mu$ M, <sup>b</sup> In 5 mM Tris-HCl/NaCl buffer in Milli-Q water (pH 7.2). <sup>c</sup> In 5 mM Tris-HCl/NaCl buffer in D<sub>2</sub>O.



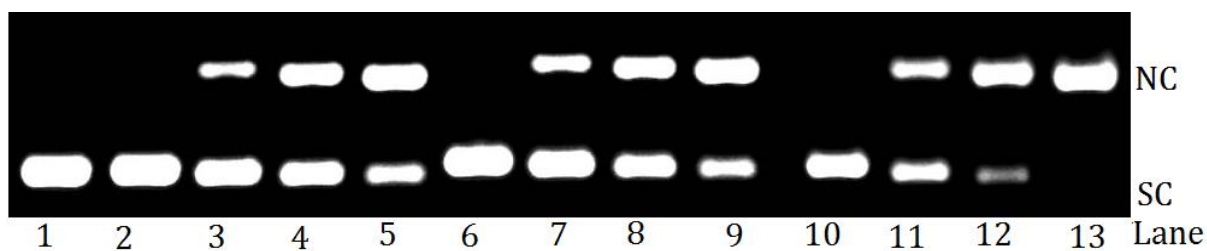

**Figure S24.** Cleavage of SC pUC19 DNA (0.2  $\mu\text{g}$ ) by the complexes **1-3** at 100  $\mu\text{M}$  concentration in Tris-HCl/NaCl buffer (pH, 7.2) on photo-irradiation in UV-light at 312 nm for varying time of photoexposure.

| SI. No. | Reaction condition     | $t / \text{min}$ | SC(%) | NC(%) |
|---------|------------------------|------------------|-------|-------|
| 1.      | DNA control            | 60               | 96    | 4     |
| 2.      | DNA + complex <b>1</b> | 0                | 97    | 3     |
| 3       | DNA + complex <b>1</b> | 20               | 75    | 25    |
| 4       | DNA + complex <b>1</b> | 40               | 50    | 50    |
| 5       | DNA + complex <b>1</b> | 60               | 29    | 71    |
| 6       | DNA + complex <b>2</b> | 0                | 96    | 4     |
| 7       | DNA + complex <b>2</b> | 20               | 70    | 30    |
| 8       | DNA + complex <b>2</b> | 40               | 51    | 59    |
| 9       | DNA + complex <b>2</b> | 60               | 27    | 73    |
| 10      | DNA + complex <b>3</b> | 0                | 95    | 5     |
| 11      | DNA + complex <b>3</b> | 20               | 53    | 47    |
| 12      | DNA + complex <b>3</b> | 40               | 23    | 77    |
| 13      | DNA + complex <b>3</b> | 60               | 5     | 95    |
